# Supplementary material
Source: MDPI journal article supplement (https://www.mdpi.com/2673-9992/3/1/6)
Supplement: s1 [file s1]

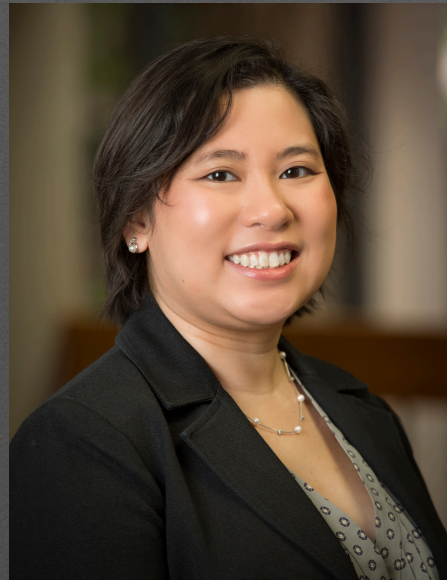

# Elucidating the role of XRN2-mediated DNA repair programs

**Tuyen T. Dang, Ph.D.**

Mentor: Julio C. Morales, Ph.D.

University of Oklahoma Health Science Center

Department of Neurosurgery, Stephenson Cancer Center

IECC2021

[tuyen-dang@ouhsc.edu](mailto:tuyen-dang@ouhsc.edu)



# Take Home Messages

Goal: To determine the mechanism by which XRN2 mediates therapy resistance

- XRN2 expression is elevated in glioblastoma multiforme (GBM) and is correlated with poor survivorship rate
- XRN2 mediates multiple pathways in particular DNA damage repair
- XRN2's targets are required for efficient DNA repair
- XRN2's targets are potential lynchpins in cancer development



# XRN2 is elevated in GBMs

**A.** XRN2 expression  
Normal vs GBM

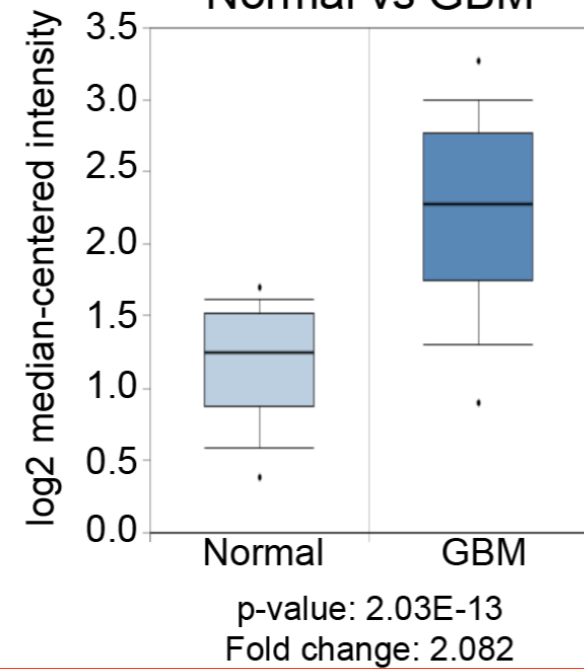

**B.** XRN2 Patient Survivorship

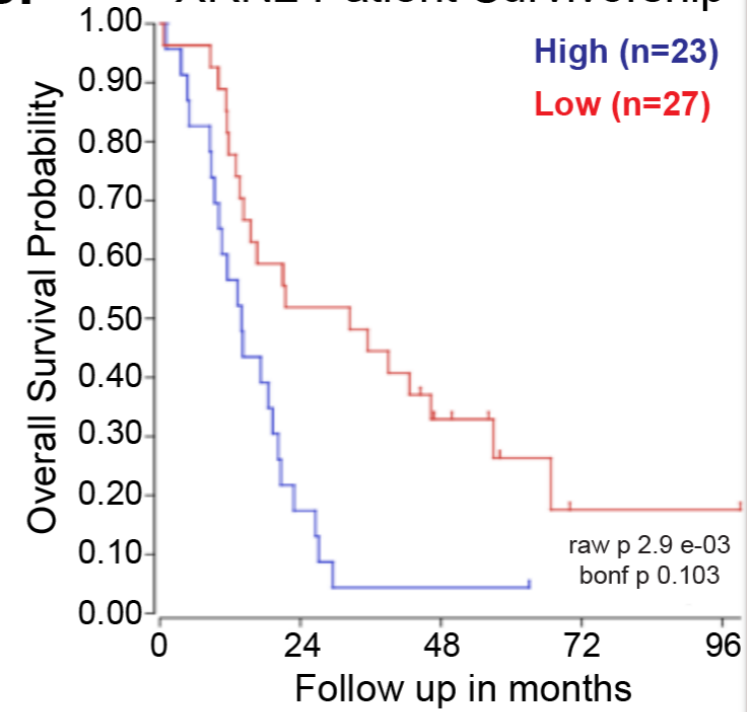

Normal

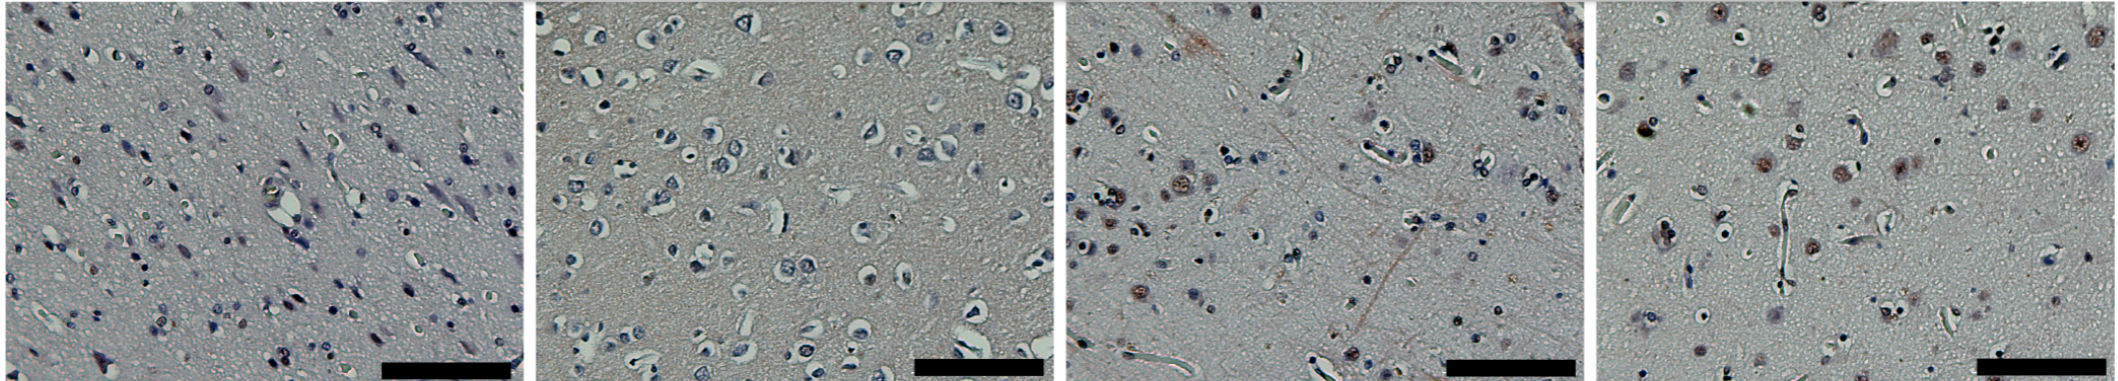

Glioblastoma

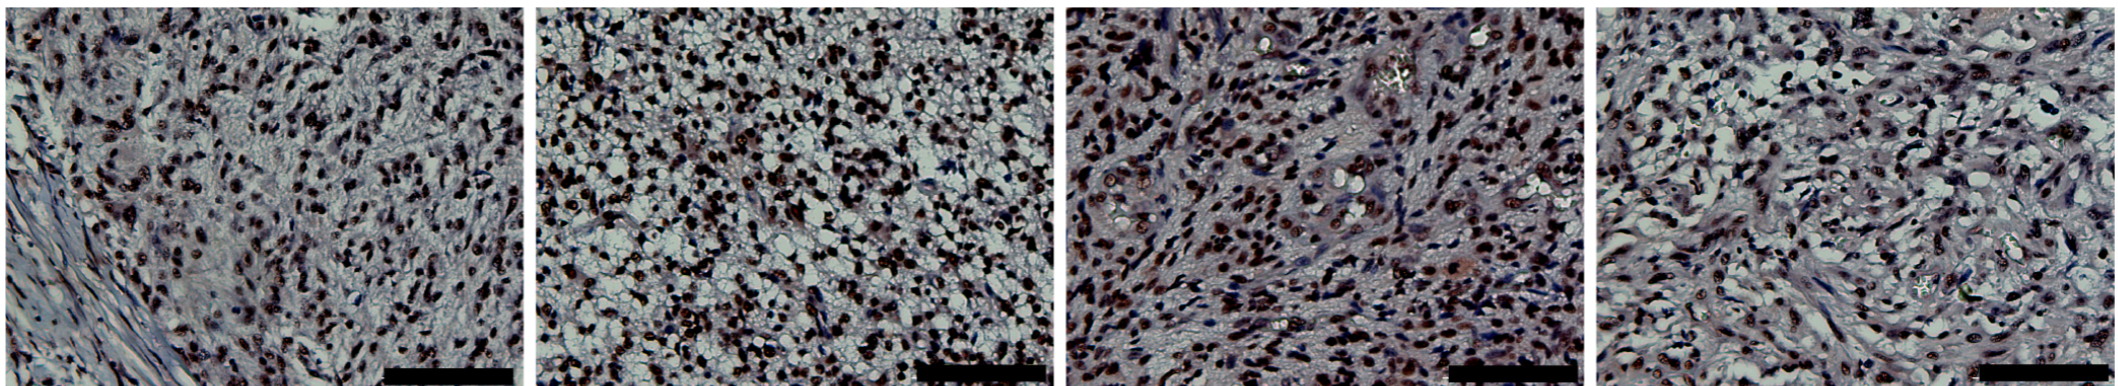



# XRN2, a 5'-3' exoribonuclease

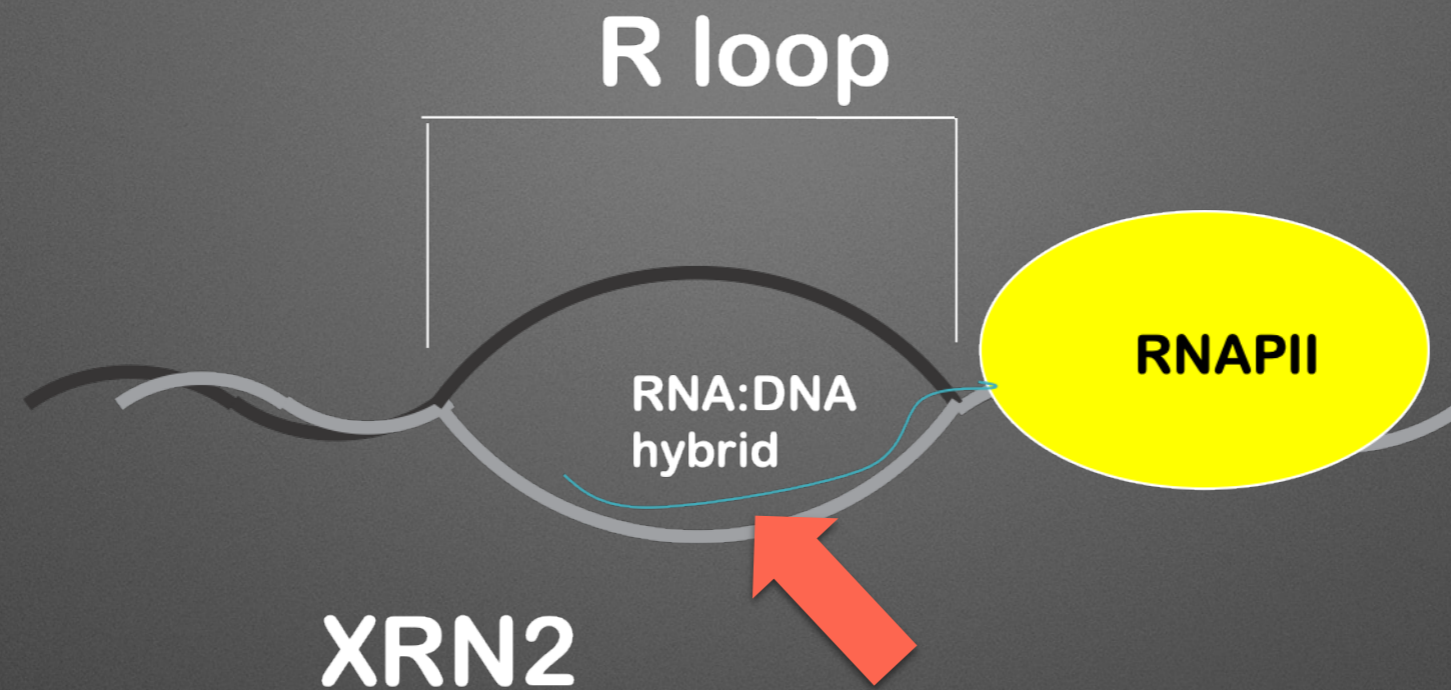

- Involved in R-loop resolution during transcription termination (Manley and Proudfoot groups)
- Loss of XRN2 leads to a global increase in R loop formation (Morales, J et.al. PLOS Genetics, 2016)
- Recently found to be involved in DNA double stranded break repair (Dang, T et. al Cancers, 2020)



# XRN2 is required for cell survival against genotoxic agents

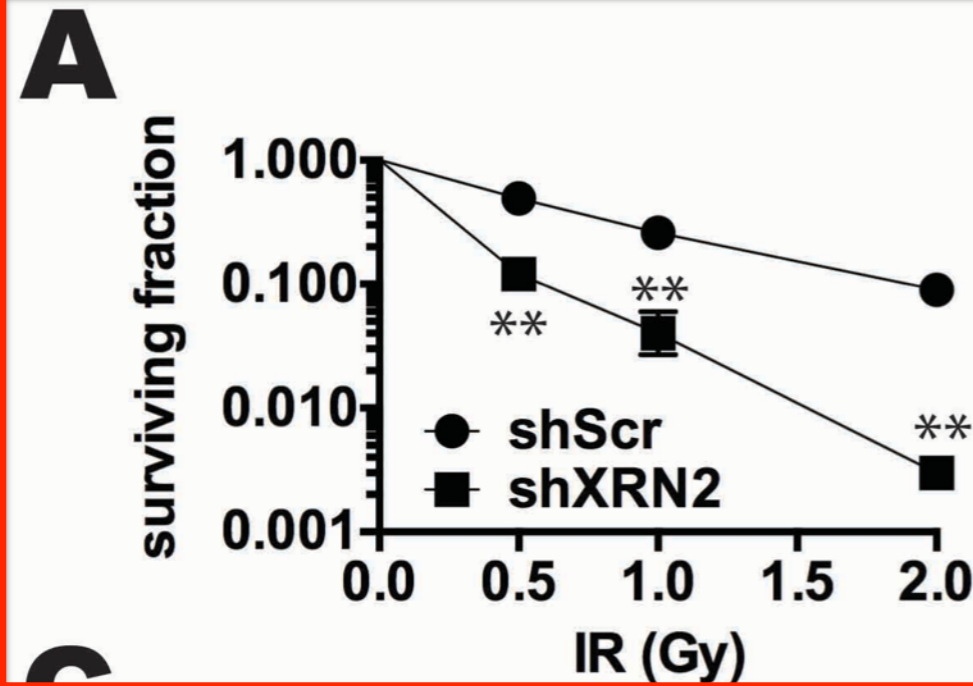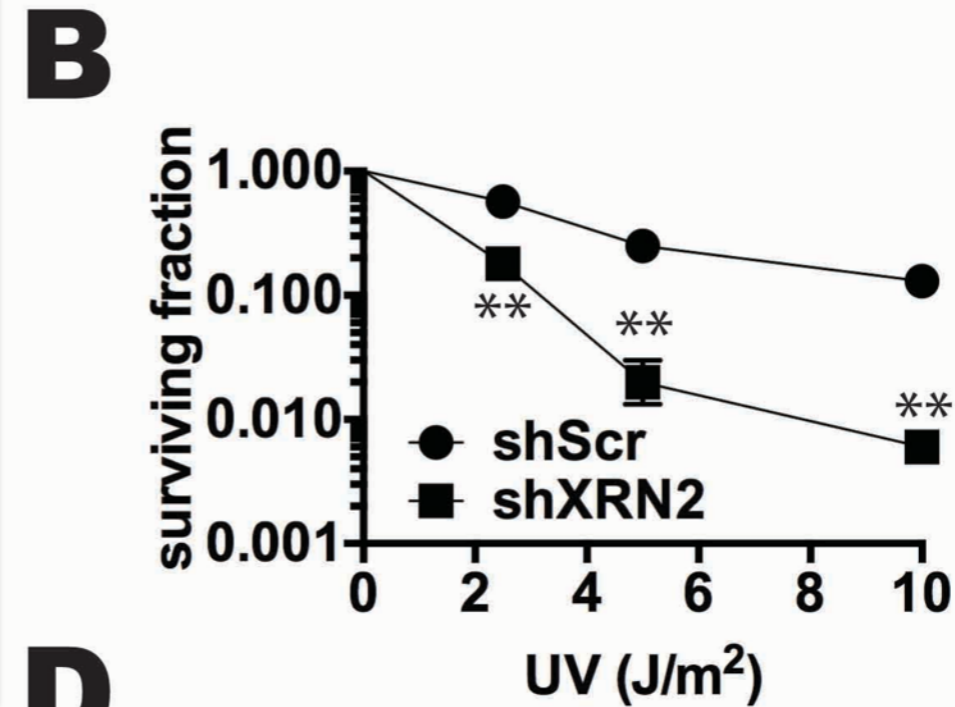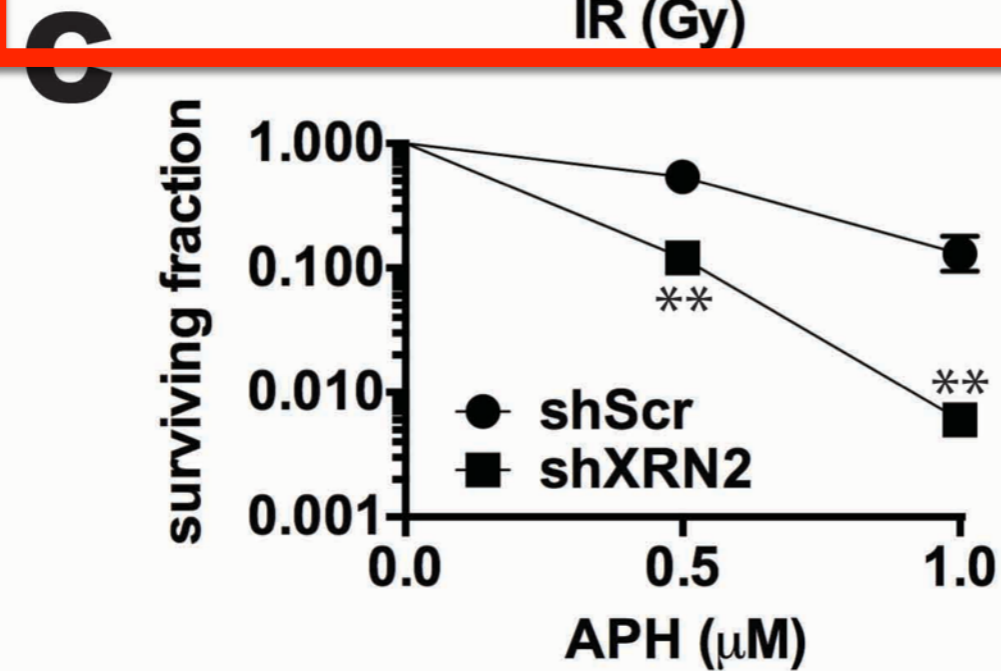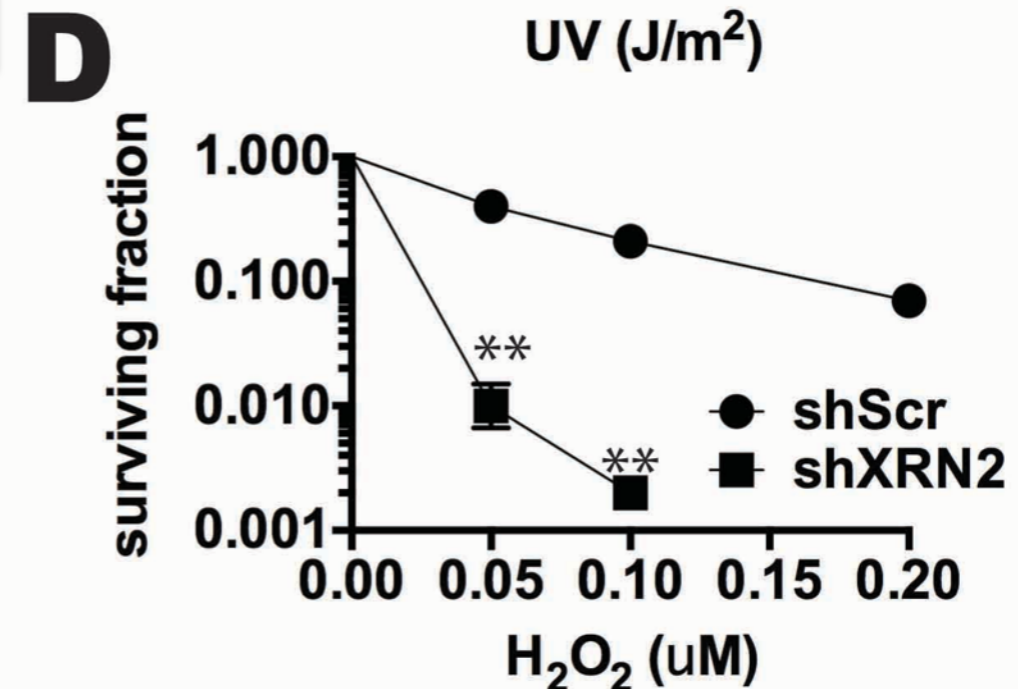



# XRN2 affects DNA double stranded break repair

Reporter cell line for HR or NHEJ repair

+ I-SceI (introduces double stranded breaks)

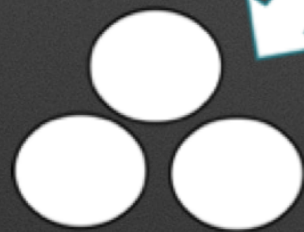

Unsuccessful repair

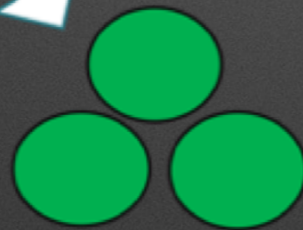

Successful repair

Homologous Recombination

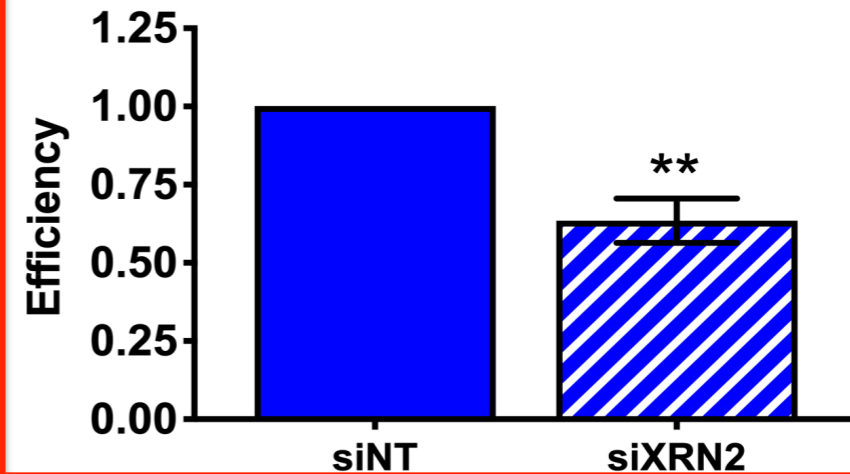

Non-Homologous End-joining Repair

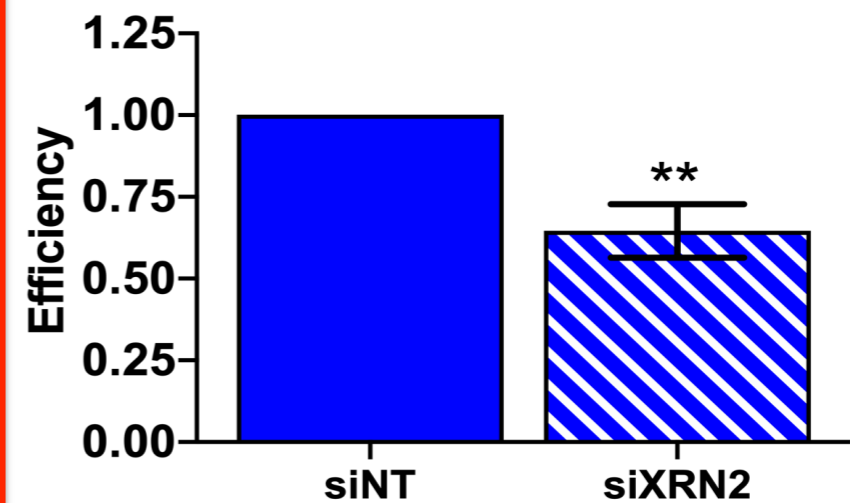



# R loops can mediate gene expression

**a** Transcription activation at CpG island promoters

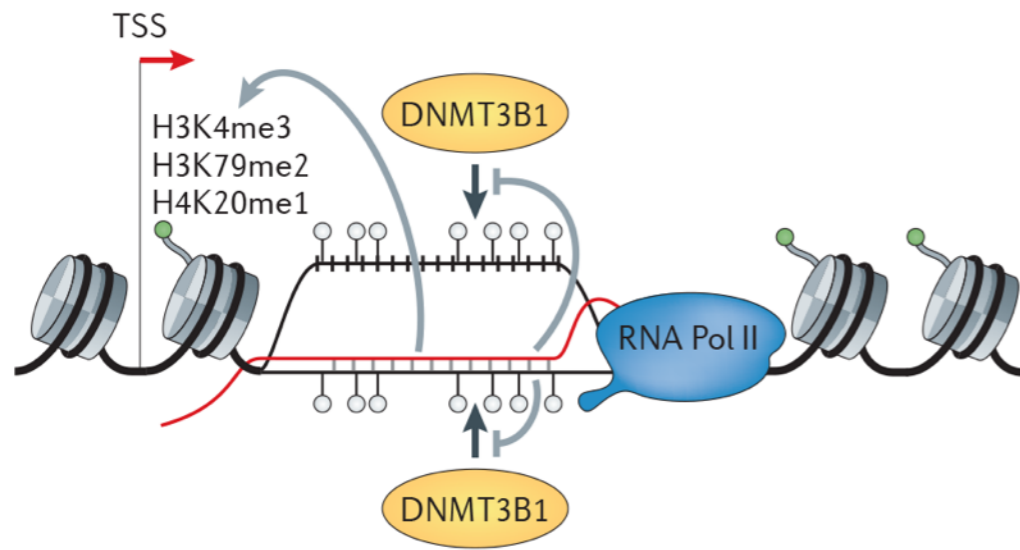

**b** Transcription activation at the *VIM* promoter

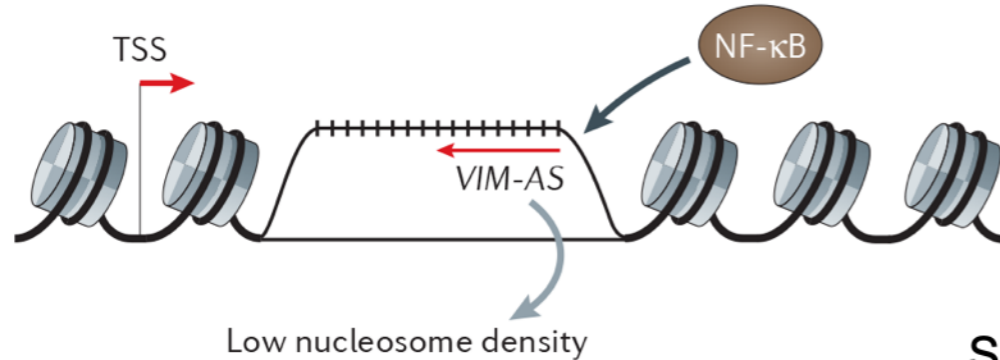

**d** Transcription termination in yeast cells

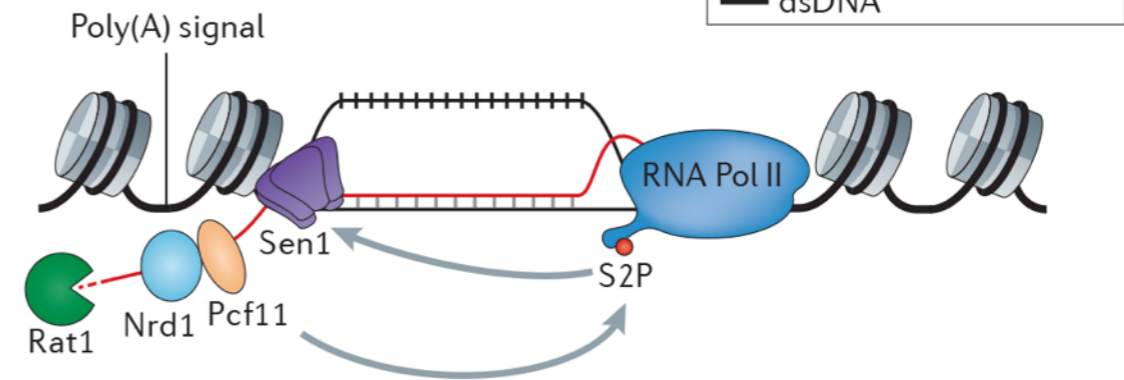

**e** Transcription termination in human cells

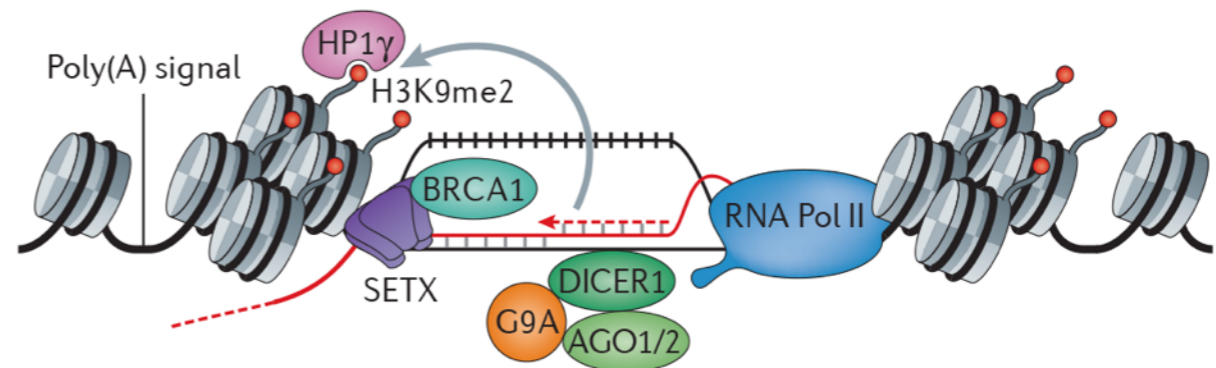

Santos-Pereira JM and Aguilera A. Nature Review Genetics, 2015



# XRN2 regulates DNA damage repair program

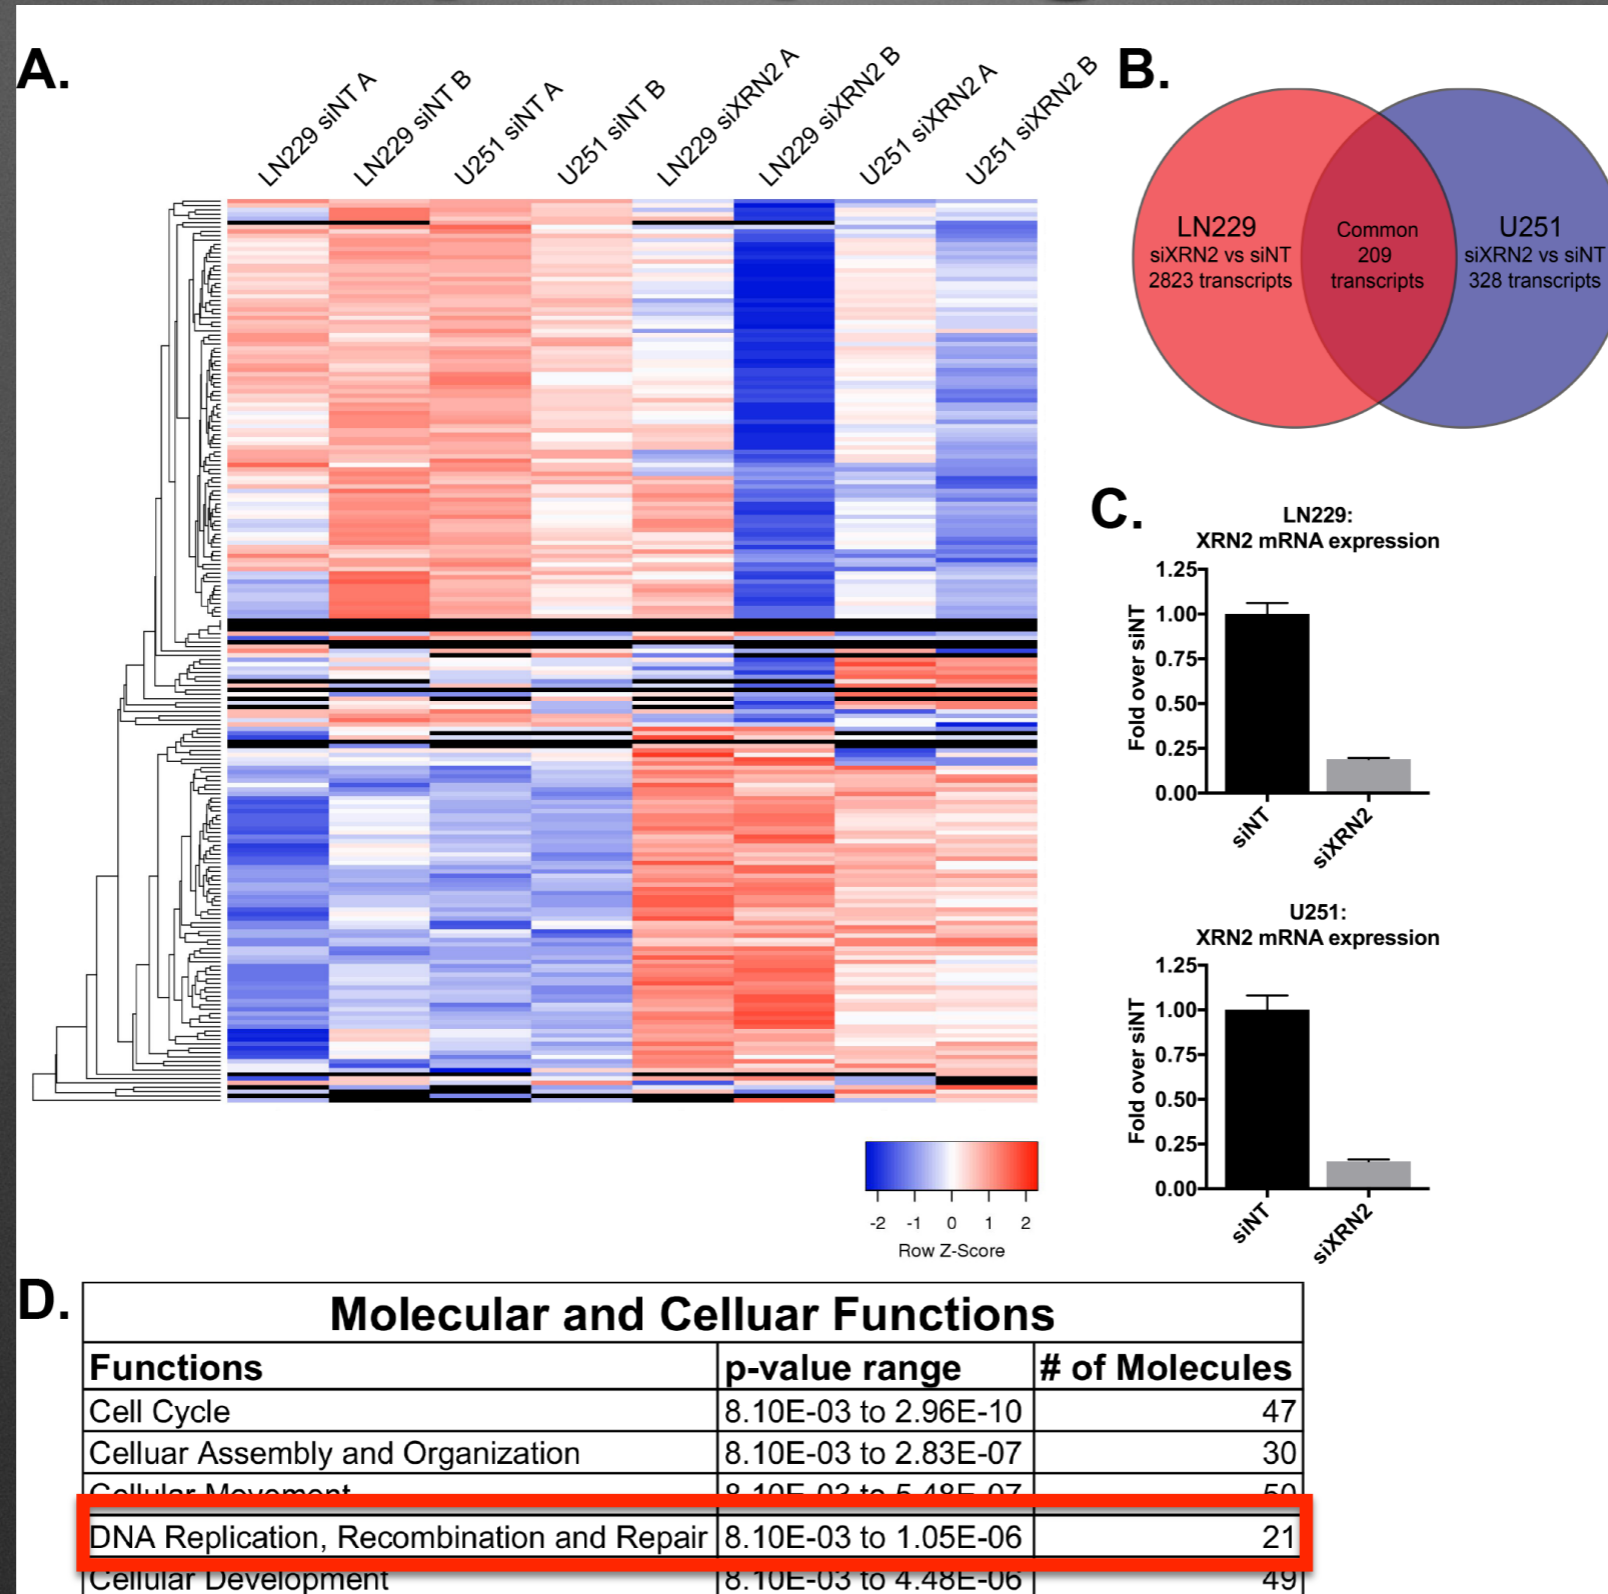



# Loss of XRN2 targets increases DNA damage

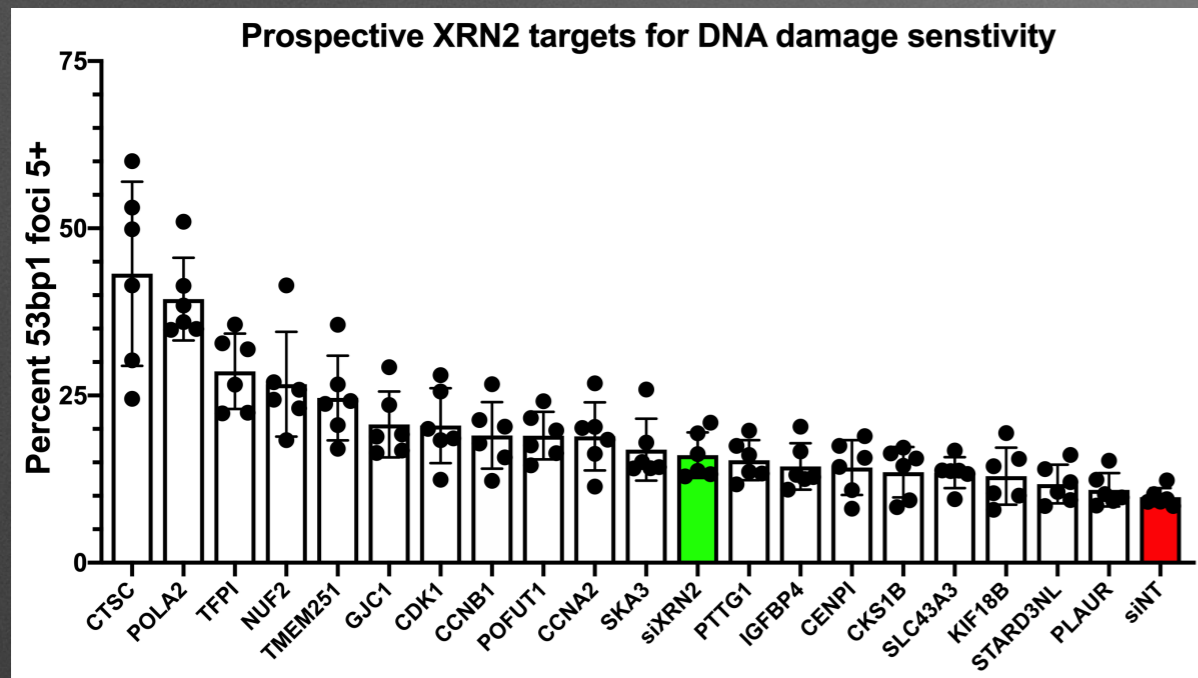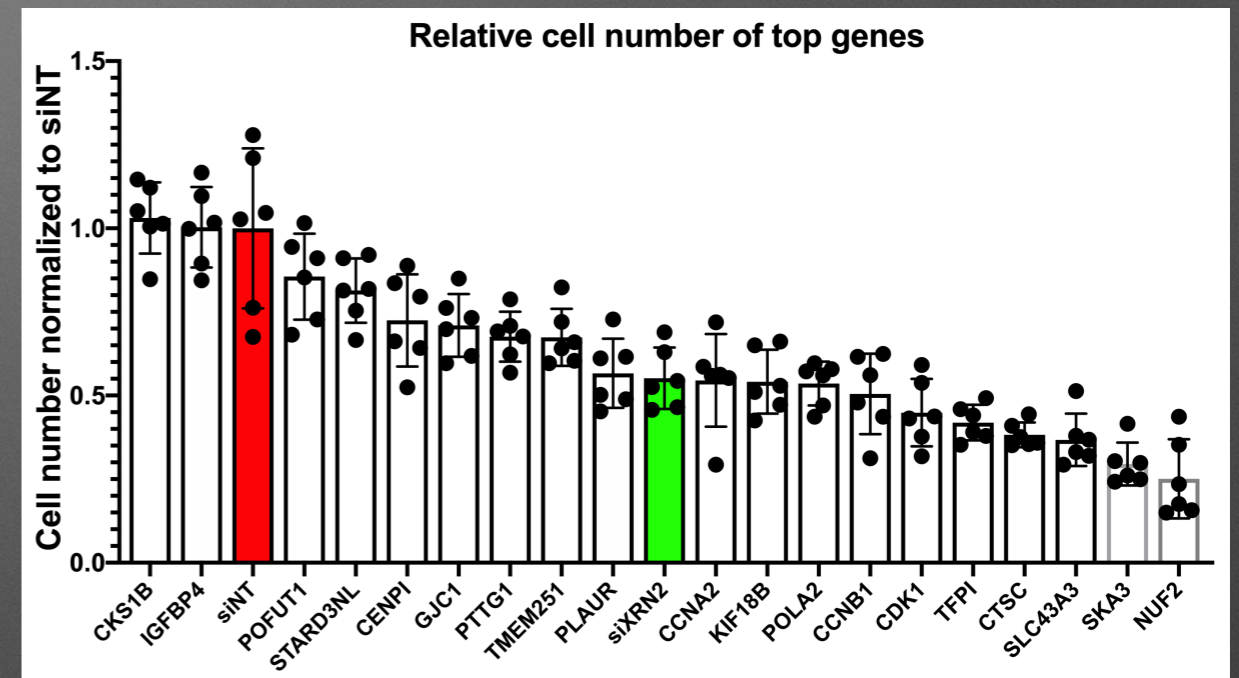

## Cherry pick list for HR and NHEJ assays (6):

POLA2 (DNA polymerase alpha 2, accessory subunit)

CDK1

CCNB1

CENPI (centromere protein I)

CCNA2

PTTG1 (securin, pituitary tumor-transforming 1)

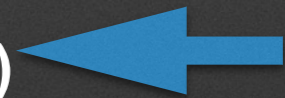



# POLA2 is upregulated in GBM patients

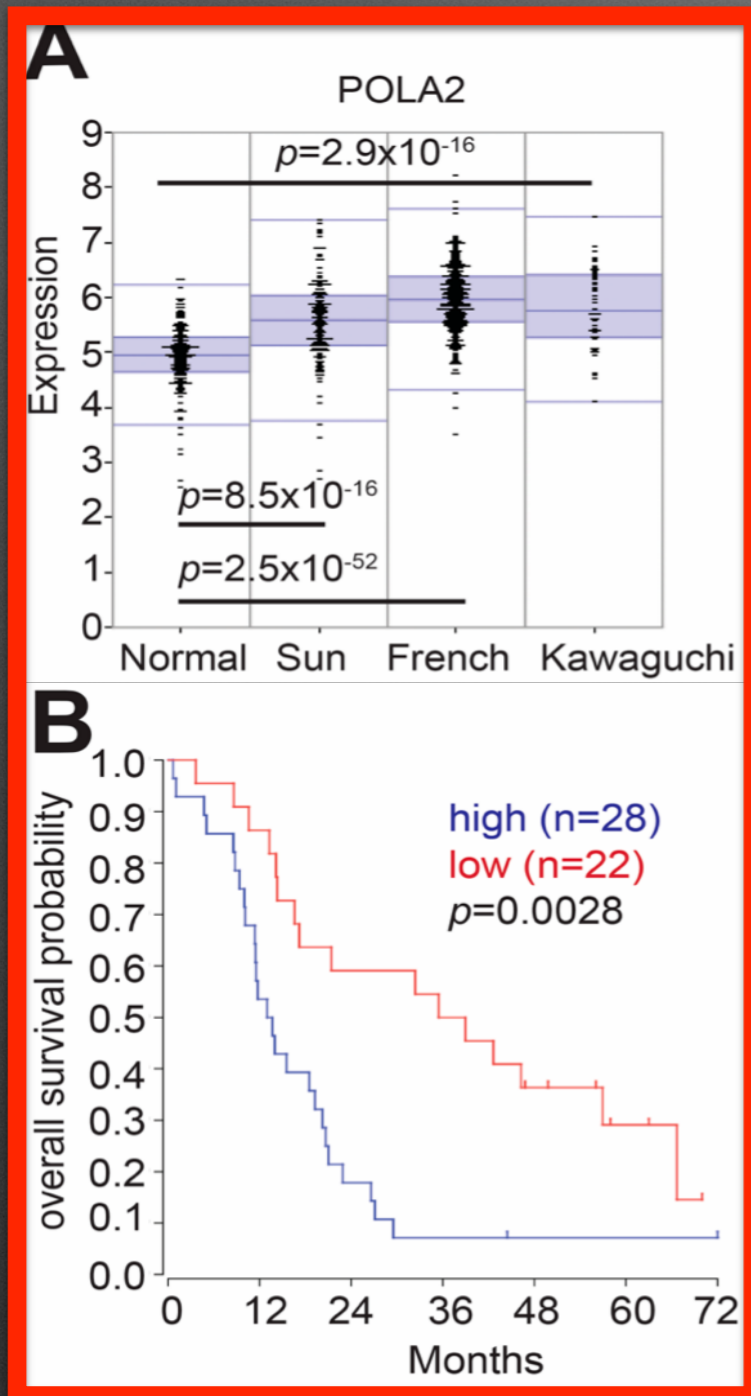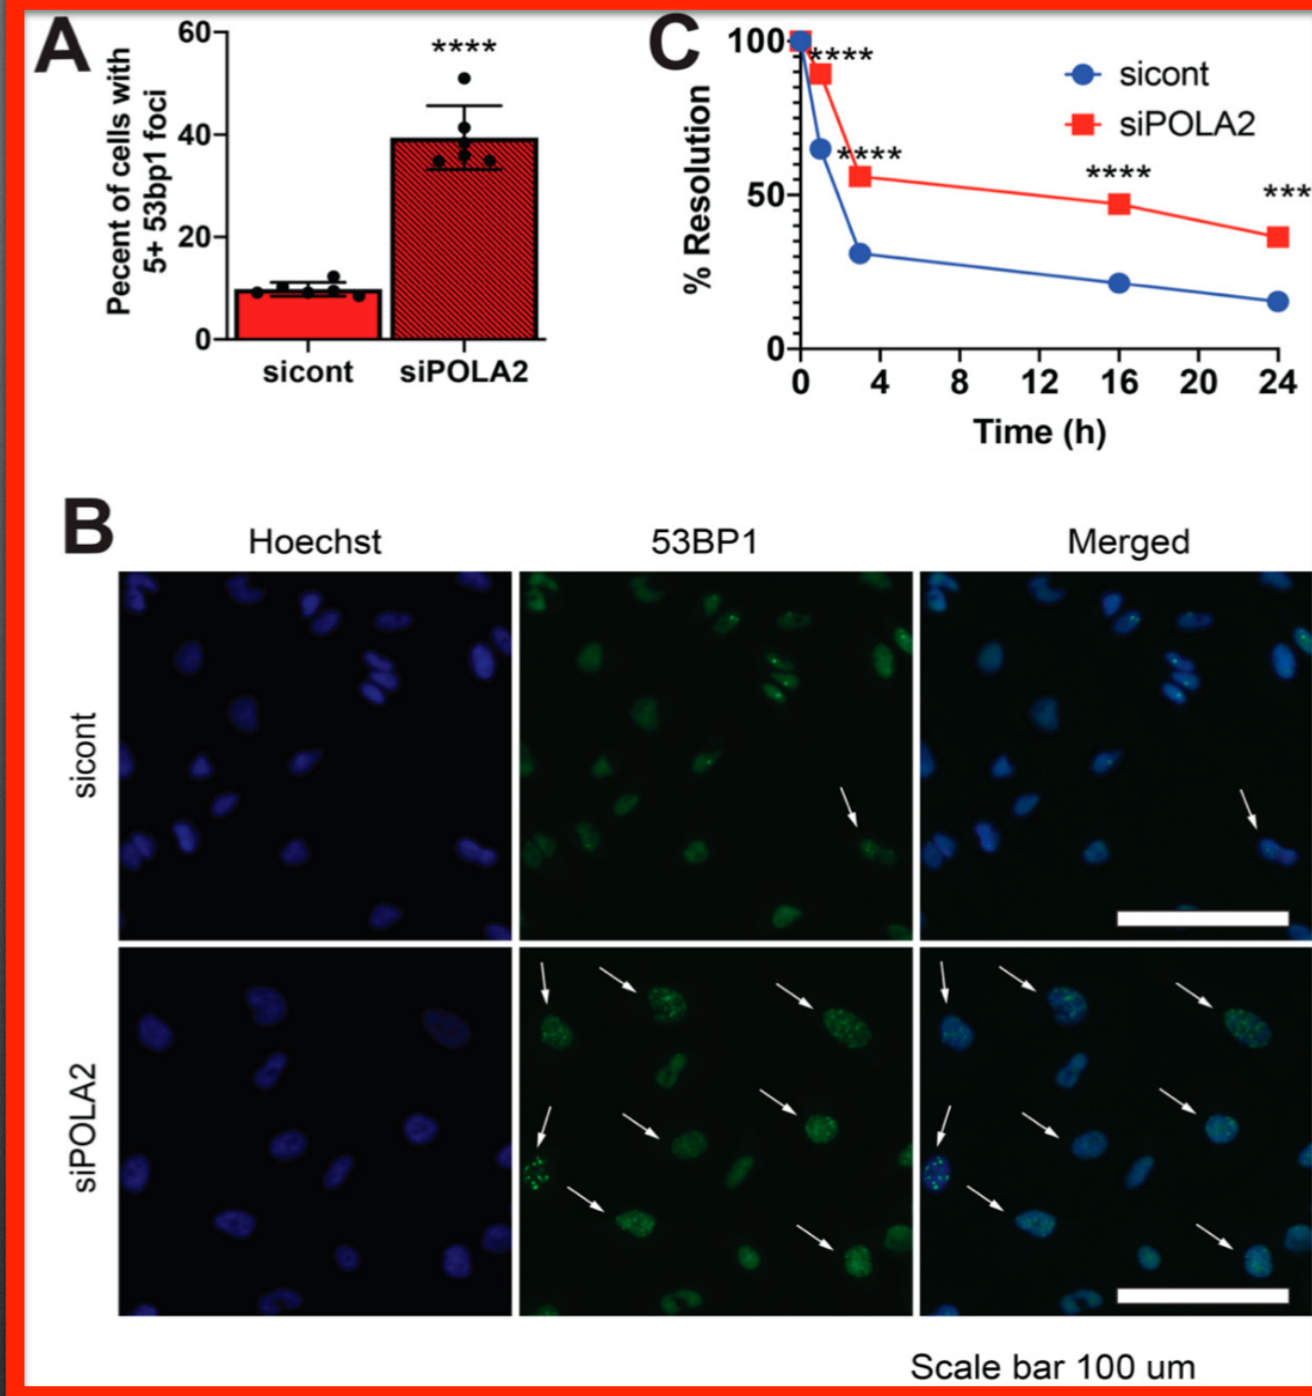



# POLA2 required for efficient DNA repair

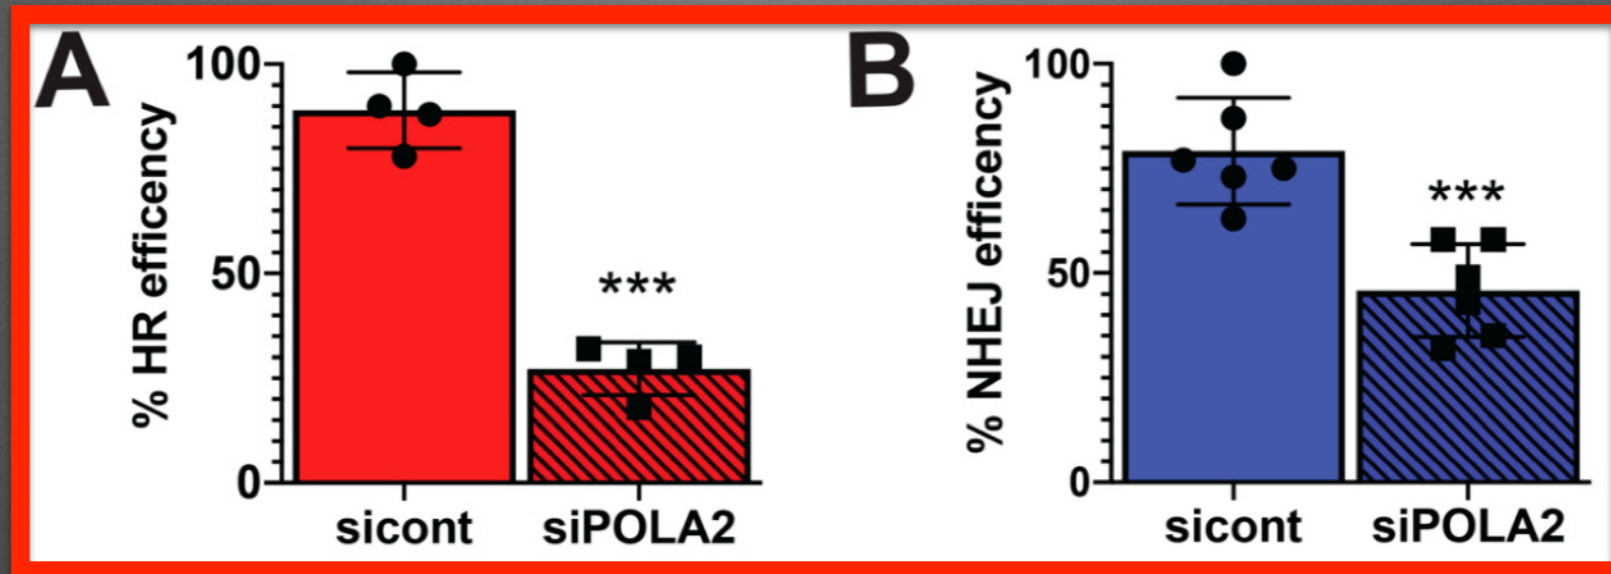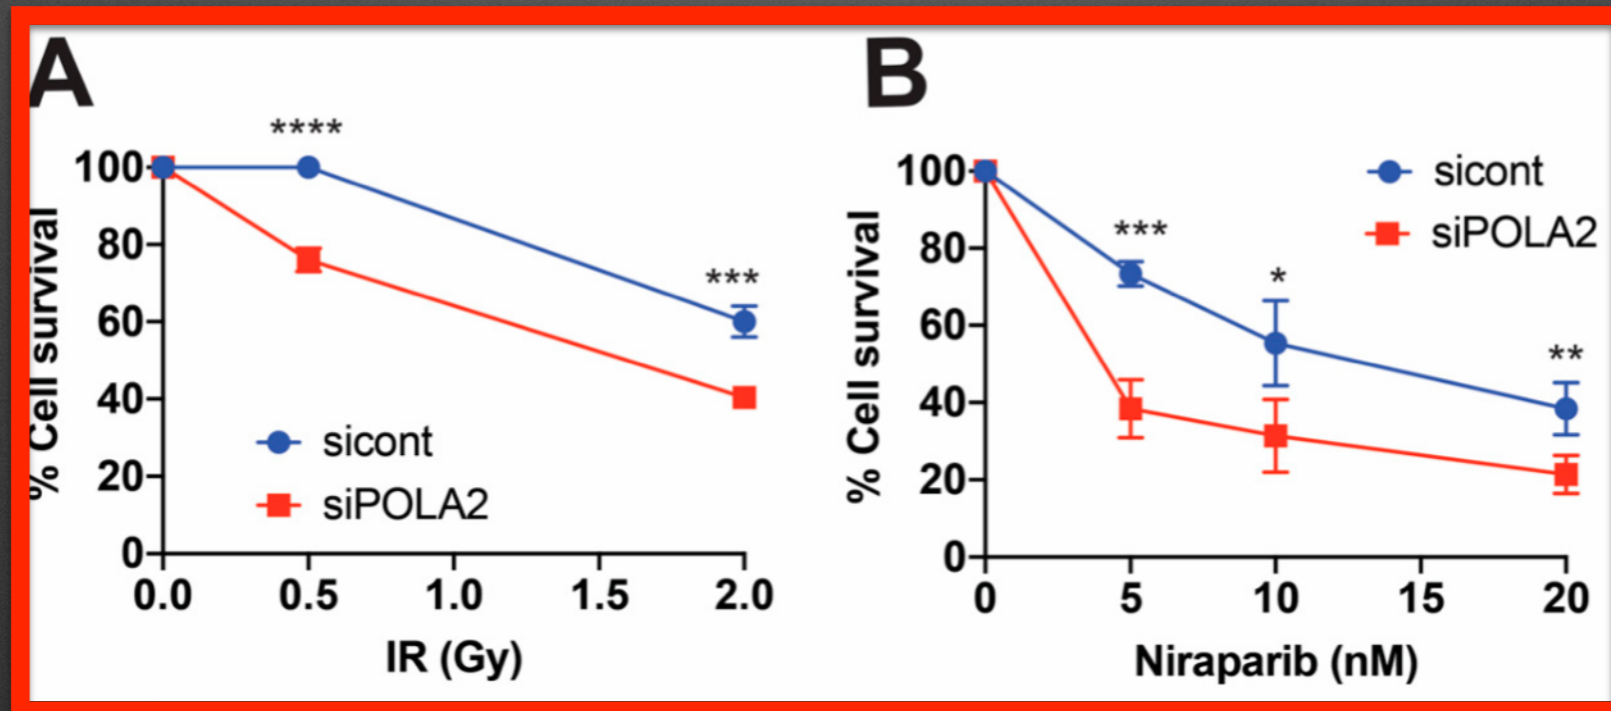



# POLA2 is required for the efficient repair of DNA double stranded-breaks

- POLA2 is up-regulated in GBM tumors
- High expression of POLA2 confers with poorer patient outlook
- POLA2 is required for efficient repair of DNA double stranded breaks through HR and NHEJ
- Loss of POLA2 sensitizes cells to IR and Parp-1 inhibition



# Upregulation of CENPI is detrimental to GBM patients

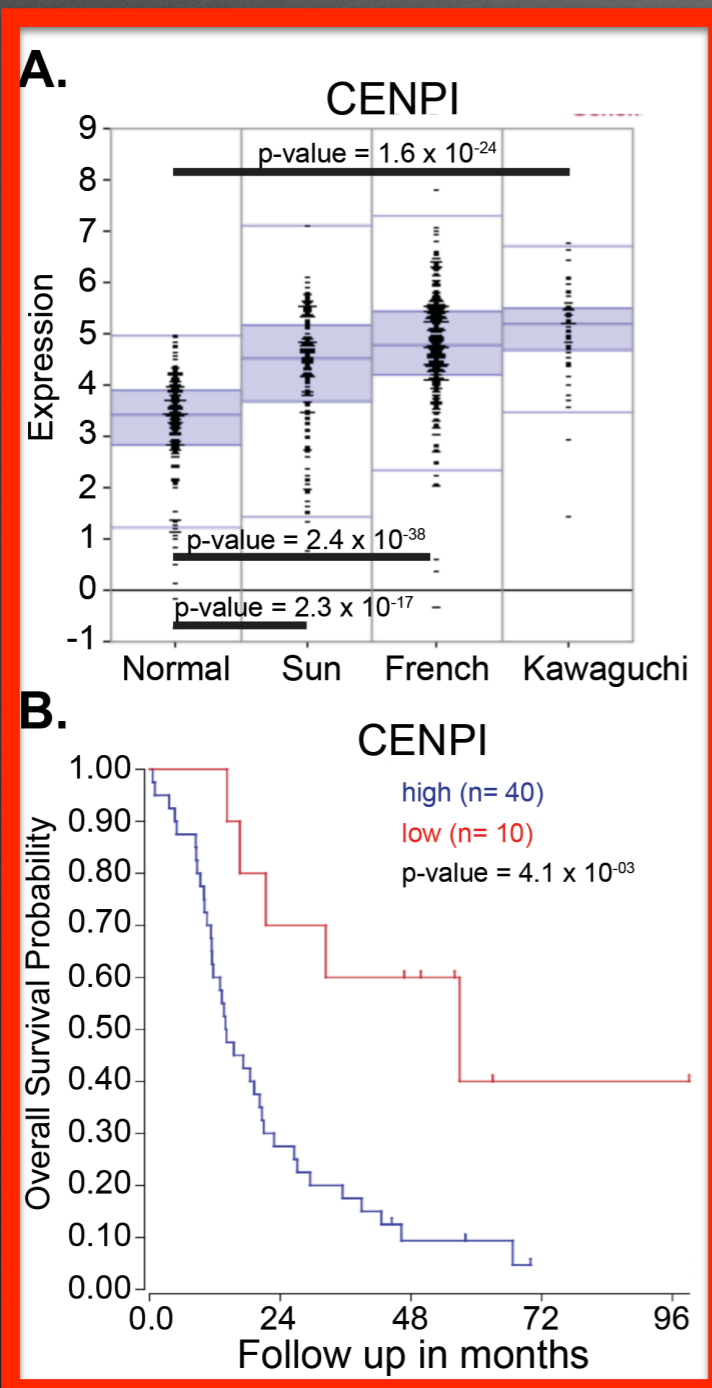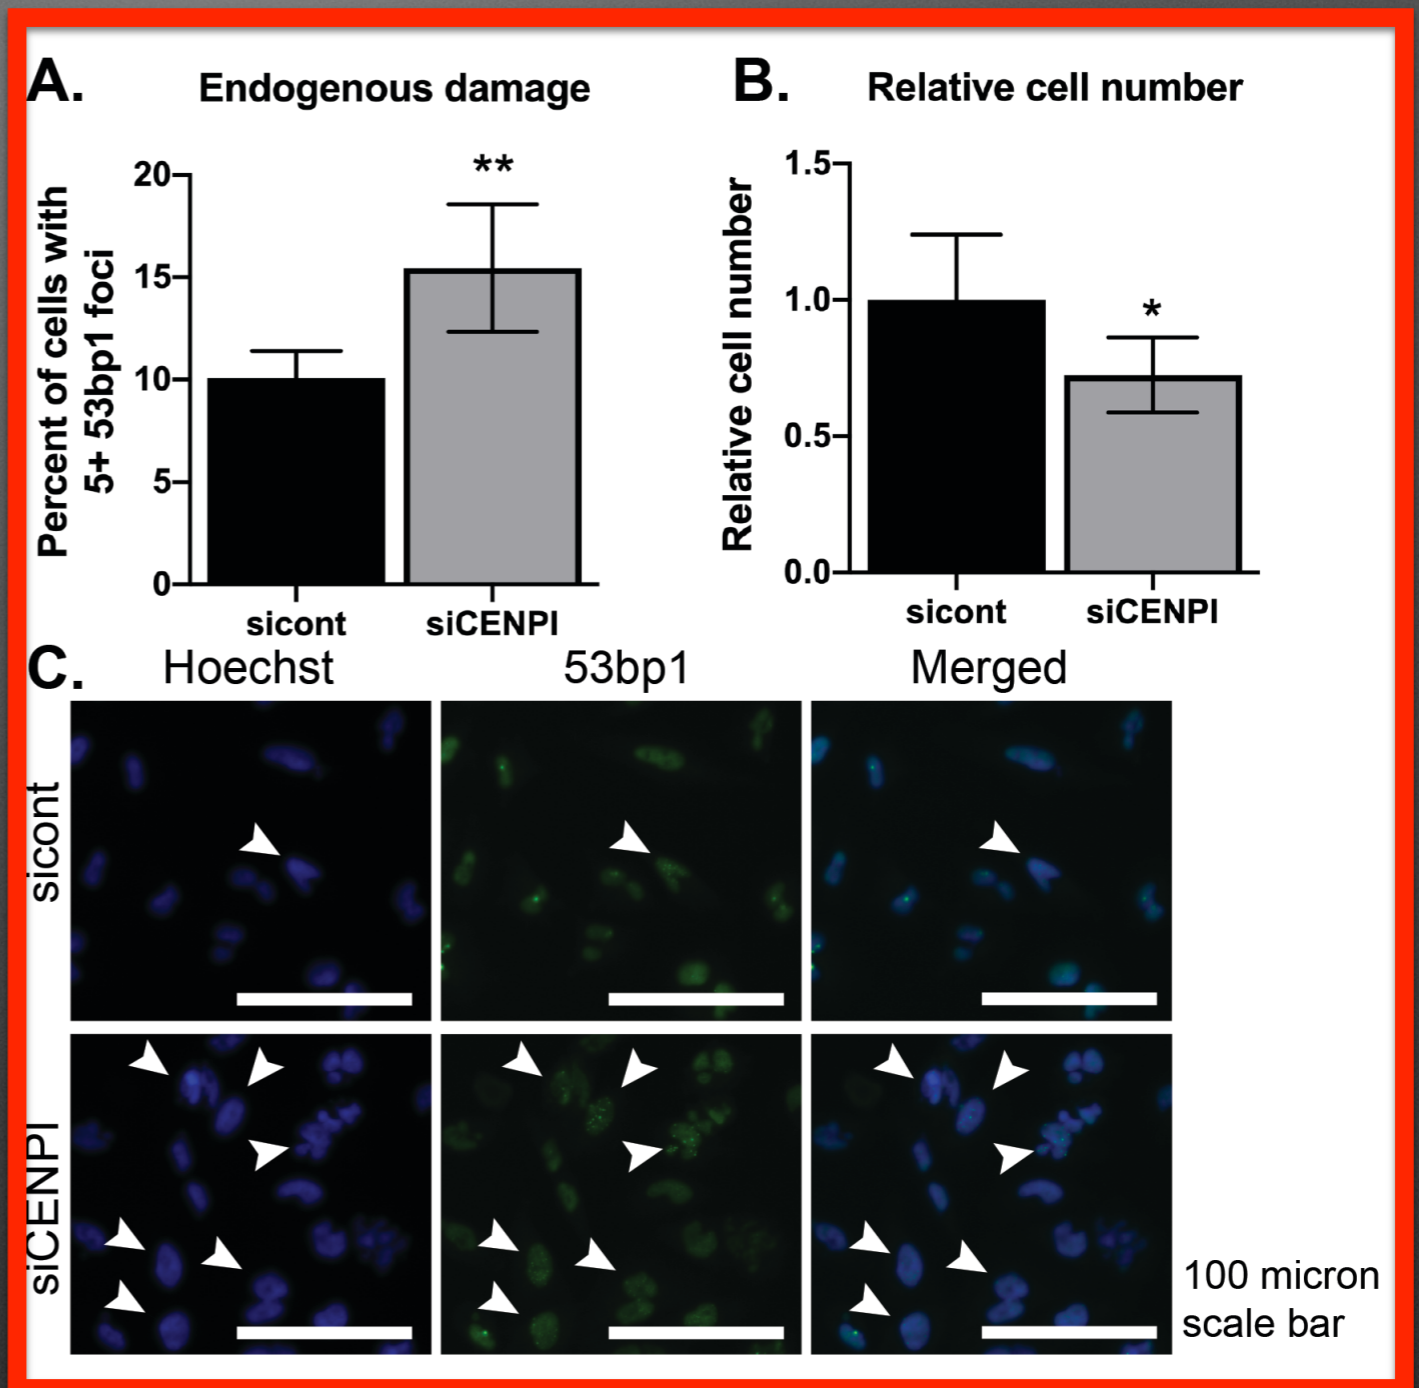



# CENPI is required for efficient HR repair

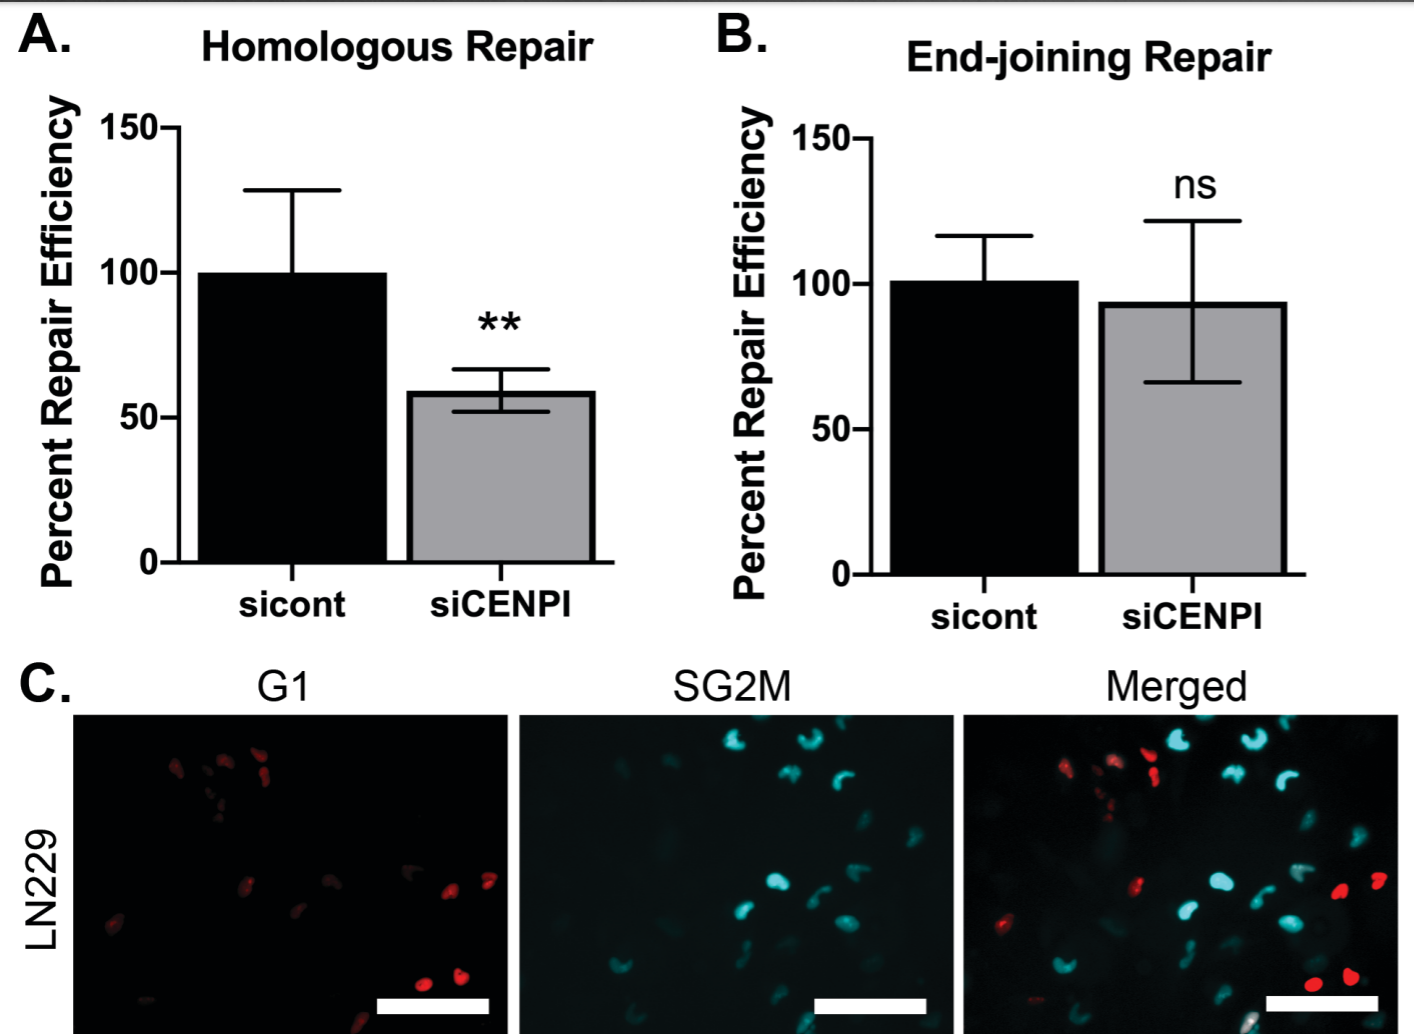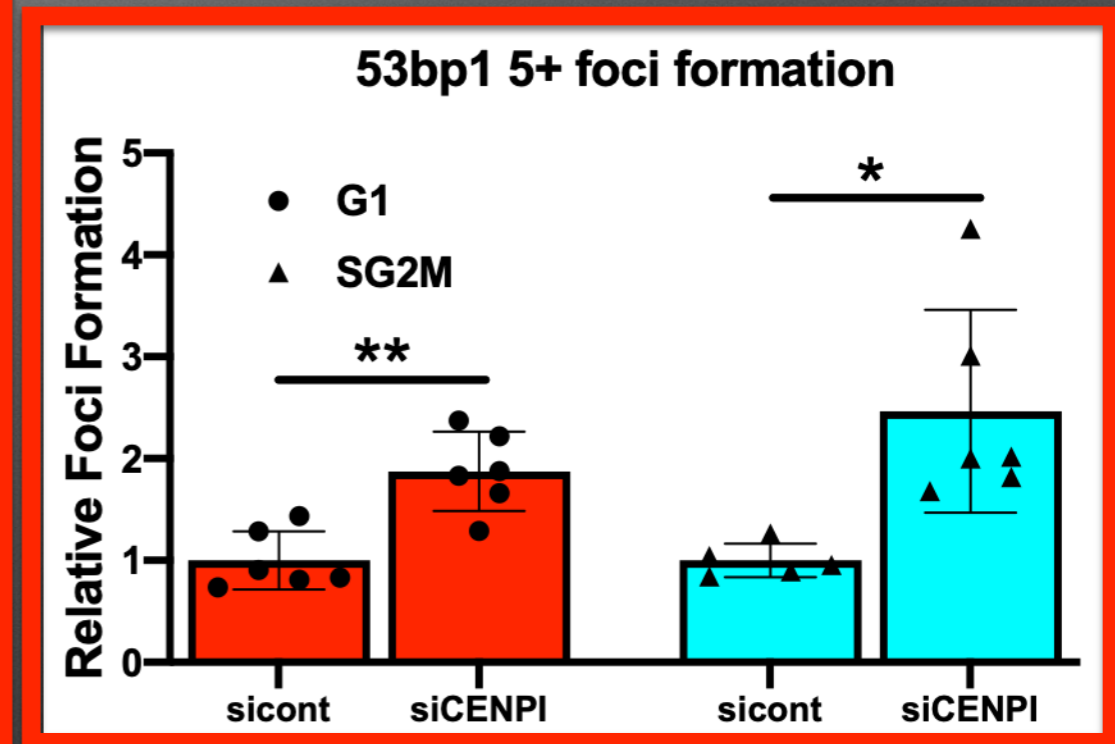



# Loss of CENPI impair DNA repair kinetics in S/G2/M

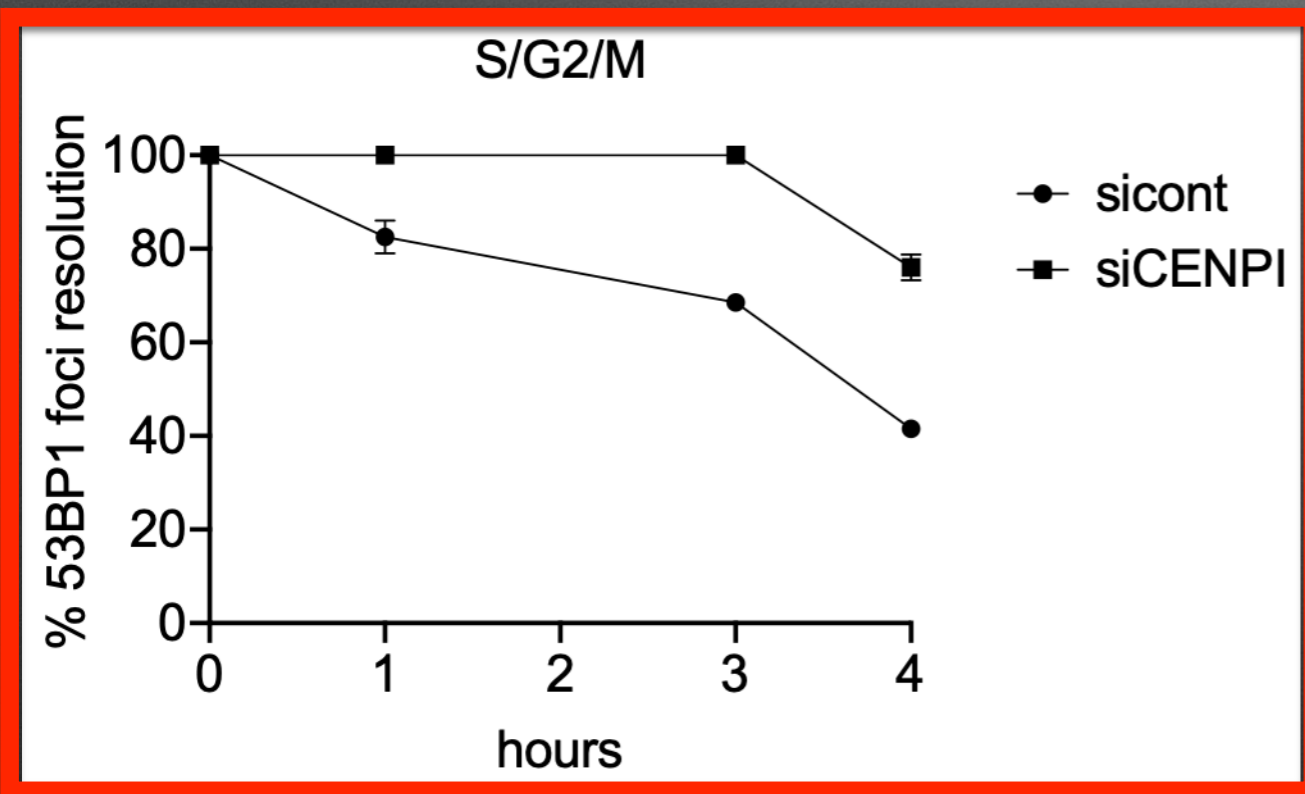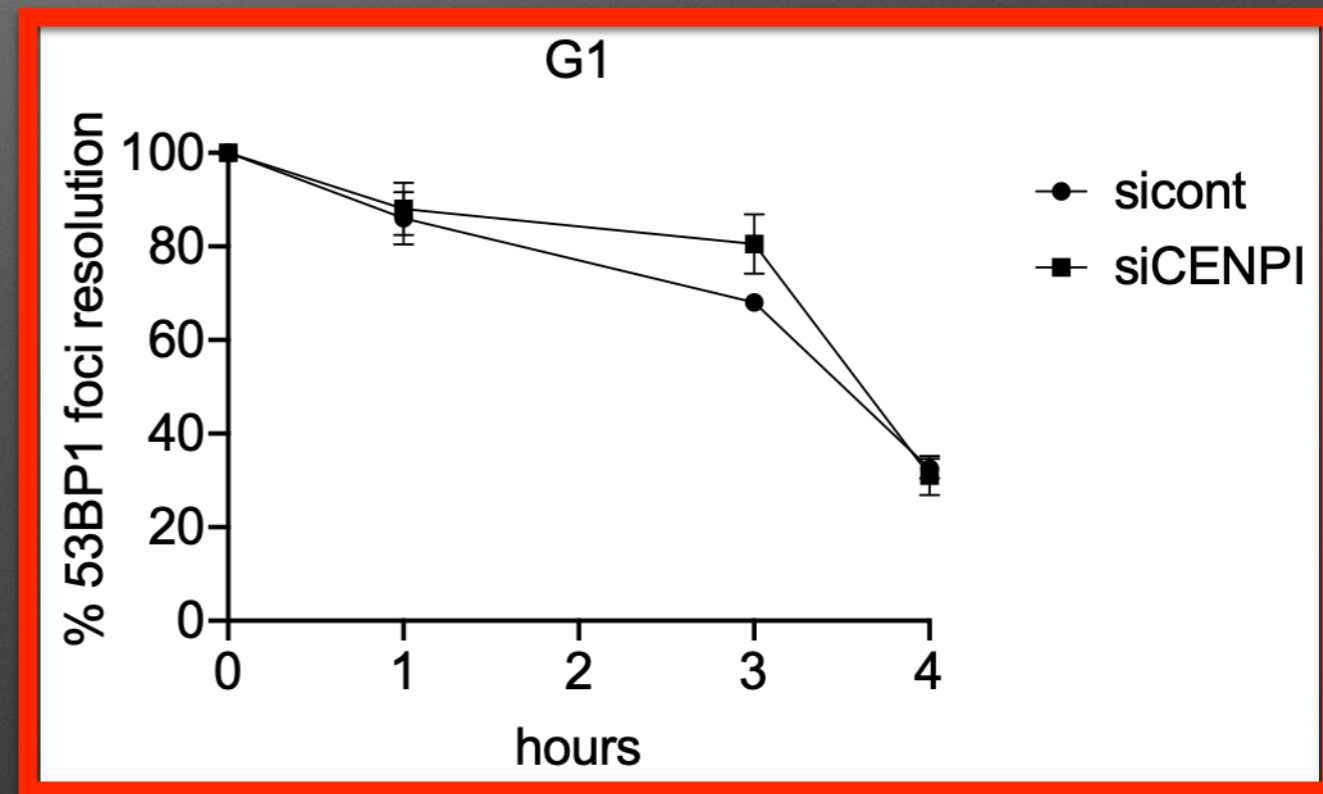



# CENPI is required for the efficient repair of DNA double stranded-breaks through HR

- CENPI is up-regulated in GBM tumors
- High expression of CENPI confers with poorer patient outlook
- CENPI is required for efficient repair of DNA double stranded breaks through HR and not NHEJ



# XRN2 and its targets are novel regulators of DNA repair programs

- XRN2 and its targets are required for efficient DNA double stranded break repair
- Loss of expression in XRN2 or its targets sensitizes cells to DNA damaging agents
- POLA2 is required for efficient repair of DNA double stranded breaks through HR and NHEJ
- CENPI is required for efficient homologous repair of double stranded breaks



# Acknowledgements

Morales Lab

Dr. Julio Morales

Stark Lab

Dr. Jeremy Stark

OUHSC Genomics Core

Dr. Allison Gillaspy

Jenny Gipson

Funding: P20GM103639 granted to JCM





# Elucidating the role of XRN2-mediated DNA repair programs

**Tuyen T. Dang, Ph.D.**

Mentor: Julio C. Morales, Ph.D.

University of Oklahoma Health Science Center

Department of Neurosurgery, Stephenson Cancer Center

IECC2021

[tuyen-dang@ouhsc.edu](mailto:tuyen-dang@ouhsc.edu)
